# Supplementary material for: GenAI Exceeds Clinical Experts in Predicting Acute Kidney Injury following Paediatric Cardiopulmonary Bypass
Source: Research Square preprint supplement (doi:10.21203/rs.3.rs-5370136/v1), 2025-04-29
Supplement: Supplementary file [file 0d388f909ad6809b009b99e6.pdf]

# Supplementary Material - GenAI Exceeds Clinical Experts in Predicting Acute Kidney Injury following Paediatric Cardiopulmonary Bypass

Mansour Sharabiani [Corresponding author: mt5605@imperial.ac.uk]<sup>a</sup>,  
Alireza Mahani [Corresponding author: alireza.s.mahani@gmail.com]<sup>b</sup>, Alex  
Bottle<sup>a</sup>, Yadav Srinivasan<sup>c</sup>, Richard Issitt<sup>c</sup>, Serban Stoica<sup>d</sup>

<sup>a</sup>*Department of Primary Care and Public Health, Imperial College London, UK*

<sup>b</sup>*Statman Solution Ltd., 128 City Road, London, EC1V 2NX, UK*

<sup>c</sup>*Great Ormond Street Hospital, London, UK*

<sup>d</sup>*Bristol Royal Hospital for Children, Bristol, UK*

---

---

## A. AI Explaining AI - Part 1

### A.1. Prompt

The following shows the prompt preamble and sample data that follows it, asking OpenAI’s `gpt-4-turbo` model to interpret the difference between two partitions of patients according to their planned operations. One partition was generated by applying spherical k-means to embeddings of the `operation` field by the `OpenAI-large` embedding model (‘AI cluster’). The other partition was created by using the PRAiS v2 protocol (‘expert cluster’). As can be seen below, the prompt did not reveal to the LLM which partition corresponded to AI/expert cluster:

A group of pediatric patients have undergone cardiopulmonary bypass surgery (CPB). For each patient, we have one or more descriptions concatenated via ‘;’ into a single sting. Each patient is printed on a single line. The descriptions represent one or more surgical procedures performed during the CPB. The dataset has been partitioned into 15 groups by two different clustering methods (Partition 1 and Partition 2), based on the aforementioned text entries for the patients. Clusters of patients in each partitioning scheme are separated by multiple blank lines. The two partitioning of patients are printed below. Note that the input to

the two partitioning schemes has been an identical set of patients, with each patient having the same exact text entry in both cases. Please provide a brief interpretation of the most salient differences between the two partitions:

Partition 1:

Atrial septal defect (ASD) secundum closure with direct suture  
Atrial septal defect (ASD) secundum closure with patch  
Atrial septal defect (ASD) secundum closure with patch;Pacemaker  
system placement: permanent epicardial  
Sinus venosus defect (ASD) closure  
Atrial septal defect (ASD) secundum closure  
Coronary sinus interatrial communication (ASD) repair  
Atrial septal defect (ASD) secundum closure with patch;Atrial  
septal defect (ASD) secundum closure with direct suture  
Atrial septal defect (ASD) secundum closure with patch;Pericardial  
window creation  
Atrial septectomy  
ATRIAL SEPTAL DEFECT (ASD) SECUNDUM CLOSURE  
WITH PATCH  
Atrial septal defect (ASD) secundum closure with direct suture;Aortopexy

Subaortic obstruction relief  
Left ventricular outflow tract obstruction relief;Implantable car-  
dioverter & defibrillator (ICD) implantation: epicardial  
Right ventricular outflow tract obstruction relief  
...  
...

=====

Partition 2:

Supravalvar aortic stenosis repair  
COR TRIATRIATUM (DIVIDED LEFT ATRIUM) REPAIR;  
ATRIAL SEPTAL DEFECT (ASD) SECUNDUM CLOSURE  
WITH PATCH  
Closure of multiple ventricular septal defect (VSD)s  
Supravalvar aortic stenosis repair;Pulmonary valvotomy: open

Aortic valvotomy: open;Supravalvar aortic stenosis repair  
 Rastelli procedure: intraventricular left ventricle to aorta tunnel  
 & right ventricle to pulmonary artery conduit;Ventricular septal  
 defect (VSD) closure using patch;120102. Atrial septal defect  
 (ASD) secundum closure with direct suture  
 Supravalvar aortic stenosis repair;Aortic arch repair  
 Cor triatriatum (divided left atrium) repair  
 COR TRIATRIATUM (DIVIDED LEFT ATRIUM) REPAIR

Mitral valvar procedure  
 Ross procedure: aortic valve or root replacement with pulmonary  
 autograft & pulmonary valvar replacement  
 Subaortic obstruction relief  
 ...  
 ...

#### *A.2. LLM Response*

Below is the full text of OpenAI’s `gpt-4-turbo` response to the above prompt:

Partition 1 and Partition 2 present two different clustering methodologies based on a range of complex cardiopulmonary bypass (CPB) surgeries. Here are some observations that highlight differences in the clustering approach and organization of these partitions:

1. **Partition Focus**: - **Partition 1** appears to group data based on specific types and complexities of surgeries, with more focus on nuanced relationships between different surgeries common in pediatric cardiology (e.g., combinations of ASD repair methods, valve repairs, and VSD closures). - **Partition 2** appears more segmented, potentially dividing patients by broader surgical categories, like major surgery types (Aortic arch repairs, Tetralogy of Fallot repairs, Norwood procedures, etc.). This suggests a more high-level clustering compared to the specific procedural focus in Partition 1.
2. **Detail of Procedure Combination**: - **Partition 1** shows detailed combinations of surgeries, indicating a clustering based

on specific multi-procedural patient cases (e.g., ASD closure combined with VSD closure and pulmonary artery reconstructions). - **Partition 2** while still detailed, often seems to place cases in broader procedural categories rather than intricate combinations, hinting at clustering by primary or most substantial procedure types.

3. **Repetition and Organization**: - **Partition 1** presents a form of clustering where similar procedures are often grouped together irrespective of the additional minor procedures, likely showing clusters based on primary intervention. - **Partition 2** regularly reuses certain procedures across different clusters, possibly categorizing based on a combination of the surgical procedure and some other clinical factors like patient demographics or surgical outcomes.

4. **Consistency and Case Sensitivity**: - Both partitions notably mix cases with varying capitalizations and details in the procedure descriptions, which suggests that the clustering isn't strictly dependent on textual exactness but rather on the procedural content. However, **Partition 1** seems to tolerate more variations within clusters, while **Partition 2** may be using a stricter or different set of criteria likely incorporating additional clinical variables beyond just procedural similarity.

5. **Cluster Titles and Patient Outcomes**: - Neither partition explicitly titles their clusters, which requires interpretation based on the listed procedures alone. However, the clustering logic in **Partition 2** may hint at broader outcome-based or pathology-based groupings (such as focusing on all patients undergoing arterial switch operations, regardless of accompanying procedures).

6. **Granularity**: - **Partition 1** tends to have finer granularity, focusing on the specific procedural nuances. **Partition 2**, while detailed, appears geared towards broader surgical categories, potentially suited for analyses like resource allocation or broad outcome studies.

The differences suggest diverse utility: **Partition 1** is more suitable for studies needing detailed procedural interconnections

(useful in operational research, detailed post-operative complications studies) while **Partition 2** could better serve broad-brush analyses such as policy-making, general clinical outcomes, or resource planning. The choice between partitions would depend on the specific needs of the research or administrative tasks at hand.

## B. LLM Structured Output

In this section, we present the details of how the structured output features of OpenAI and Google LLM were used when requesting cluster labels, based on the descriptions of diagnosis and operation codes associated with each CPB.

### B.1. OpenAI

OpenAI’s structured output feature is an evolution of their JSON mode. As of this writing, it is available for `gpt-4o-mini-2024-07-18` or later, or for `gpt-4o-2024-08-06` or later. See [here](#) for details.

To use this feature, we define the classes that capture what we expect to get back for each cluster. Here, we indicate to the LLM that we want to get 1) the group number (consistent with the group numbers provided in the prompt body), 2) short description of each group, 3) long description of each group. Optionally, one can add specific character/word limits for the short and long descriptions in the prompt instructions (see B.3), or otherwise modify the template as necessary for each project:

```
class GroupLabel(BaseModel):
    group_number: int
    description_short: str
    description_long: str

class MultipleGroupLabels(BaseModel):
    groups: list[GroupLabel]
```

We can now submit a completion request to OpenAI by passing in the class `MultipleGroupLabels`:

```

response = openai_client.beta.chat.completions.parse(
    model = 'gpt-4o'
    , messages = [
        {"role": "system", "content": prompt_instructions},
        {"role": "user", "content": prompt_body}
    ]
    , response_format=MultipleGroupLabels
)

```

The arguments `prompt_instructions` and `prompt_body` are discussed further down.

### B.2. Google

For Google, we use a JSON template to convey our expectations about the response structure. Below is the schema definition:

```

response_schema = {
    "type": "object",
    "properties": {
        "groups": {
            "type": "array",
            "items": {
                "type": "object",
                "properties": {
                    "group_number": {"type": "integer"},
                    "description_short": {"type": "string"},
                    "description_long": {"type": "string"},
                },
                "required": [
                    "group_number", "description_short",
                    "description_long"
                ],
            },
        },
    },
    "required": ["groups"],
}

```

which is included in the following request:

```

response = model.generate_content(
    prompt_full
    , generation_config = GenerationConfig(
        response_mime_type = "application/json"
        , response_schema = response_schema
    )
)

```

In the above, `model` is a properly instantiated `GenerativeModel` model defined in the `vertexai.generative_models` module, and `prompt_full` is the concatenation of `prompt_instructions` and `prompt_body`, discussed next.

### B.3. Prompt

The prompt consists of two sections: 1) the preamble or instructions to the LLM, and 2) the body, containing data in numbered clusters that must be described by the LLM. Below is the instructions paragraph, corresponding to the case where clusters have been created using both **diagnosis** and **operation** fields:

#### Prompt Instructions

The following is a list of 963 pediatric patients undergoing cardiopulmonary bypass. Each row contains one or more surgical procedures, separated by ';'. These are followed by one or more diagnoses, also separated by ';'. Patients have been grouped into 10 groups, according to their diagnoses and procedures. Please suggest group labels that are representative of their members, and also distinct from each other:

The body consists of group (or cluster) number, followed by observations in that group. For each observation, the value of the relevant text field(s) is printed. In cases where we combine multiple text fields, we preface each text field with the name of the field. Below is an excerpt to illustrate the point. (*Italics* and **boldface** are added for highlighting in the manuscript, and prompts submitted to LLMs are plain text.)

## Prompt Body

### Group 1:

*Operations:* aortic root replacement: valve sparing technique ||

*Diagnoses:* aortic regurgitation; congenital anomaly of aortic valve; doubly committed juxta-arterial ventricular septal defect (vsd) with anteriorly malaligned fibrous outlet septum and perimembranous extension

*Operations:* scimitar syndrome (partially anomalous pulmonary venous connection) repair || *Diagnoses:* partial anomalous pulmonary venous connection of scimitar type

*Operations:* aortic valvar replacement using mechanical prosthesis; left ventricular outflow tract obstruction relief || *Diagnoses:* aortic regurgitation; lv outflow tract obstruction; aortic valvar stenosis - congenital; discordant va connections (tga); superior caval vein (svc) abnormality

*Operations:* mitral valvar replacement; mitral valvar annuloplasty ||

*Diagnoses:* mitral regurgitation

*Operations:* mitral valvar procedure || *Diagnoses:* mitral regurgitation; mitral valvar abnormality; mitral valvar prolapse

...

...

=====

### Group 2:

*Operations:* vsd closure; patent arterial duct (pda) closure: surgical

|| *Diagnoses:* perimembranous central ventricular septal defect (vsd); patent arterial duct (pda)

...

...



### C. Cluster Mapping Algorithm

```
def map_clusters(cluster1_labels, cluster2_labels, N):  
    # Calculate the size of each cluster in cluster1  
    cluster1_sizes = [(i, np.sum(cluster1_labels == i)) for i in range(N)]  
    # Sort clusters by size in descending order  
    cluster1_sizes.sort(key=lambda x: x[1], reverse=True)  
    sorted_cluster1_indices = [i for i, size in cluster1_sizes]  
  
    mapping = [-1] * N # Initialize the mapping array with -1  
    remaining_clusters2 = set(range(N))  
  
    total_overlap = 0  
  
    for i in sorted_cluster1_indices:  
        max_overlap = -1  
        best_pair = -1  
  
        for j in remaining_clusters2:  
            # Count common elements between cluster1[i] and cluster2[j]  
            overlap = np.sum((cluster1_labels == i) & (cluster2_labels == j))  
  
            if overlap > max_overlap:  
                max_overlap = overlap  
                best_pair = j  
  
            # Map cluster i in cluster1 to best_pair in cluster2  
            mapping[i] = best_pair  
            remaining_clusters2.remove(best_pair)  
            total_overlap += max_overlap  
  
    return np.array(mapping), total_overlap
```

Figure C.1: Python implementation of an algorithm - created by the authors - for mapping two data partitions to maximise total member overlap. The algorithm is ‘greedy’ since it proceeds down a sorted list of clusters in one partition to achieve an  $O(N^2)$  scaling behaviour, instead of  $O(N!)$ , where  $N$  is the number of clusters in each partition.

Figure C.1 lists the Python implementation of our algorithm for mapping clusters between two different clustering results. It uses a greedy,  $O(N^2)$ , approach for maximising the overlap between corresponding clusters in the two sets. An exhaustive search of all possible mappings between two clusters would be an  $O(N!)$  solution. Instead, our algorithm sorts one cluster set in

descending size, and begins matching the second cluster set to the first one by one, in each step searching among the remaining clusters of the second set to find one that has maximum overlap with the cluster of focus in the first set.

This algorithm is particularly useful in evaluating the stability of clustering algorithms or comparing the results of different clustering methods. By mapping clusters based on their overlap, it provides a quantitative way to assess how similar two clustering results are, which is essential in fields like data mining, bioinformatics, and pattern recognition.

#### **D. Cluster Mapping Full Results**

The table containing the full set of results for mapping of cluster labels across ten clustering runs has been provided as *cluster\_mapping\_full\_results.csv*. It is similar to Table 5 of the main manuscript, but it has 10 columns of cluster labels, five produced by OpenAI’s **gpt-4o** model (columns ending in even digits) and five produced by Google’s **gemini-1.5-pro** model (columns ending in odd digits).

#### **E. Full Names and Revision of Hugging Face Models**

The below table provides the full names and revision numbers for the Hugging Face models used in the study. Note that ‘ClinicalBERT’ is not an embedding model out of the box. To use this model for embedding tasks, we applied mean pooling to the last hidden state of the model, which represented token-level embeddings, to arrive at sentence/document-level embeddings.

| Short Name         | Full Name (on Hugging Face)                 | Revision (Commit Hash)                   |
|--------------------|---------------------------------------------|------------------------------------------|
| Salesforce-Mistral | Salesforce/SFR-Embedding-Mistral            | 938c560d1c236aa563b2dbdf084f28ab28bccb11 |
| MiniLM-L6          | sentence-transformers/all-MiniLM-L6-v2      | 8b3219a92973c328a8e22fadcf821b5dc75636a  |
| PubMedBERT         | NeuML/pubmedbert-base-embeddings-matryoshka | 58bbcf26677463d97005dbcf45674251c3b6460e |
| SFR-Embedding-2_R  | Salesforce/SFR-Embedding-2_R                | 91762139d94ed4371a9fa31db5551272e0b83818 |
| Alibaba-gte-1.5    | Alibaba-NLP/gte-Qwen1.5-7B-instruct         | 53a17ec94db2682f967c0ab228c55a056bf767ed |
| Linq-AI-Mistral    | Linq-AI-Research/Linq-Embed-Mistral         | 0c1a0b0589177079acc552433cad51d7c9132379 |
| ClinicalBERT       | medcalai/ClinicalBERT                       | 3bb5faa9f33458dd7801549e88767c3b23264942 |
| intfloat-Mistral   | intfloat/e5-mistral-7b-instruct             | 07163b72af1488142a360786df853f237b1a3ca1 |
| GritLM-7B          | GritLM/GritLM-7B                            | 13f00a0e36500c80ce12870ea513846a066004af |
| Alibaba-gte-2      | Alibaba-NLP/gte-Qwen2-7B-instruct           | a3b5d14542d49d8e202dcf1c382a692b1607cee5 |

Table 1: List of full names and revisions for the Hugging Face models used in this study. The first column corresponds to the handle used for each model in the figures and tables of the main text.
